1 **The health impact of wood dust in Kijishi: Yamanaka Kijishi Study**

2

3 **Running head:** Health impact of wood dust

4

5 Yuki Nakao<sup>1,2</sup>, Kazuhiro Okada<sup>2</sup>, Yasuhiro Goto<sup>3</sup>, Yosuke Matsuda<sup>4</sup>,

6 Kiyohiko Fujimoto<sup>4</sup>, Yoshiyasu Okuhara<sup>5</sup>

7

8 **Author Contributions**

9 Y.N., K.O. and Y.G. conceived the ideas; Y.N., K.O., Y.G., Y.M., and K.F. collected the  
10 data; Y.N., K.O., Y.G., Y.M., and K.F. analyzed the data; and Y.N., K.O., Y.G., Y.M., K.F.  
11 and Y.O. led the writing.

12

13 **Authors' Affiliations**

14 <sup>1</sup>Graduate School of Integrated Arts and Sciences, Medical Science Program, Kochi Medical  
15 School, Kochi University, Kochi, Japan

16 <sup>2</sup>Kaga Medical Center, Kaga City, Ishikawa Prefecture, Japan

17 <sup>3</sup>Ishikawa Prefectural Institute for Yamanaka Lacquerware, Ishikawa Prefectural Training  
18 Institute of Woodturning, Kaga City, Ishikawa Prefecture, Japan

19 <sup>4</sup>Forestry and Forest Products Research Institute, Tsukuba City, Ibaraki Prefecture, Japan

20 <sup>5</sup>Center of Medical Information Science, Kochi Medical School, Kochi University, Kochi,  
21 Japan

22

23 Correspondence: Yuki Nakao

24 Graduate School of Integrated Arts and Sciences, Medical Science Program, Kochi Medical  
25 School, Kochi University, Kohasu, Oko-cho, Nankoku, Kochi, 783-8505, Japan

26 Phone: 088-880-2212

27 Fax: 088-880-2214

28 Email: yukinakao358@gmail.com

29

30 **ABSTRACT**

31 **Objectives:** It is well known that exposure to wood dust can cause Sinonasal carcinomas  
32 (SNC) and various respiratory diseases such as allergies. Japanese woodturners called kijishi  
33 work in an environment where wood dust is generated from lathes, and they are considered at  
34 risk for various diseases. However, there is a dearth of research on the health impacts of  
35 wood dust on kijishi. The purpose of this study is to understand the real situation of kijishi  
36 that are exposed to wood dust.

37 **Methods:** A questionnaire survey was conducted with 20 kijishi. We measured the amounts  
38 of wood dust two experienced kijishi were exposed to during a typical woodturning session.

39 **Results:** Approximately half the participants exhibited allergic symptoms such as rhinitis;  
40 however, this rate was equivalent to the result of the Japan Comprehensive Survey of Living  
41 Conditions 2019. SNC was not observed in any of the participants. The level of exposure to  
42 wood dust was low, that is, inhalable dust was  $0.03 \text{ mg/m}^3$ , and total dust  $0.22 \text{ mg/m}^3$ . The  
43 measured values were very low compared to the Occupational Safety and Health  
44 Administration (OSHA), National Institute for Occupational Safety and Health (NIOSH),  
45 American Conference of Governmental Industrial Hygienist (ACGIH), and Health and Safety  
46 Executive Control of Substances Hazardous to Health (HSE COSHH) standards.

47 **Conclusions:** We concluded that constant ventilation during woodturning reduces exposure  
48 to wood dust, thereby preventing harm to the health of kijishi to a considerable extent.

49

50 **Keywords:** wood dust, sinonasal carcinomas, woodworkers, Japan, traditional craft, kijishi

## 51 INTRODUCTION

52 Kijishi are Japanese craftspeople specializing in tableware, including the wan (bowl) and the  
53 bon (tray) made by woodturning. Kijishi play important roles in maintaining traditional  
54 Japanese craftwork. They first design tableware mentally and then use a rokuro (traditional  
55 lathe) to carve each piece from a chunk of wood. The process of woodturning by using a  
56 rokuro is called *rokurobiki*. Yamanaka lacquerware originated in Kaga City, Ishikawa  
57 Prefecture, Japan. Yamanaka lacquerware is renowned for its woodturning products, has the  
58 largest population of kijishi in Japan, and produces more woodturning products than  
59 anywhere else in the country.<sup>1</sup> Yamanaka Woodturning Technique Preservation Association  
60 is one of the associations to which kijishi belong in Yamanaka lacquerware.

61

## 62 Wood Dust, Preventing Exposure and Issues

63 Wood dust is generated during the woodturning process while using the rokuro, which may  
64 be a problem. Dust refers to solid particulates that are generated when a solid material is  
65 processed by a machine and is part of particulate matter floating in the air. In general, dust  
66 refers to such particulates with a size of up to 150  $\mu\text{m}$ .<sup>2</sup> The main components of wood dust  
67 are cellulose, hemicellulose, and lignin. Wood dust also contains many other low-molecular  
68 organic compounds. Studies have found that exposure to wood dust can cause not only  
69 respiratory diseases such as asthma and allergy but also sinonasal cancer sinonasal  
70 carcinomas (SNC), and it is classified as a Group 1 human carcinogen.<sup>3,4</sup>

71 To prevent apprentices from being exposed to wood dust, the training institute has  
72 installed ventilators and encourages apprentices to wear a face mask. However, little is  
73 known about kijishi who exhibit health problems from wood dust, such as respiratory  
74 diseases including asthma, allergies, and SNC. As a result, the training institute has been  
75 experiencing difficulty explaining such health problems to apprentices, and some apprentices

76 are feeling anxious. While it is known that kijishi are exposed to wood dust when they  
77 engage in wood processing, little research regarding such exposure and related health impacts  
78 has been undertaken.

79 This study aimed to shed light on the health impacts of exposure to wood dust on  
80 kijishi engaging in the production of Yamanaka lacquerware products. The study was  
81 requested by the training institute, and it received support from them; the details are  
82 mentioned in the Declarations section.

83

## 84 **METHODS**

### 85 **Participants**

86 The study comprised a survey questionnaire and wood dust collection and measurement.  
87 Participants were members of The Yamanaka Woodturning Technique Preservation  
88 Association. Many of those who had been engaged in *rokurobiki* for a long time belong to the  
89 association. A paper-based questionnaire was sent to all members of the association  
90 individually from March 4 to 30, 2020. No compensation was given for completing the  
91 questionnaire.

92

### 93 **Questionnaire Survey**

94 A questionnaire survey was administered to 20 kijishi who were members of the association.  
95 The questionnaire asked participants about items shown in Table 1.

96 [Table 1 near here]

97

### 98 **Dust Measurement**

99 In this study, levels of exposure to wood dust were measured with support from two kijishi  
100 (with 41 and 39 years of experience) who were both members of the association.

101

## 102 **Wood and Conditions for Rokurobiki**

103 Sugi (*Cryptomeria japonica*) is commonly used for building material in Japan; however, it is  
104 not suitable for woodturning because the growth rings between its latewood (winter) and  
105 earlywood (summer) bands are made of soft fibers that break during woodturning.<sup>5</sup> Hence,  
106 kijishi rarely choose sugi for woodturning. Instead, they tend to use keyaki (*Zelkova serrata*)  
107 as it can withstand the lathe and has a beautiful texture. Therefore, this study used chunks of  
108 dried keyaki (after rough turning) with a water content of 10.1% (measured by comparing  
109 samples taken before and after drying). Measurements were taken in a typical kijishi work  
110 environment (Figure 1-a). The rokuro was operated at a maximum of 1000 rpm.

111

## 112 **Conditions for Ventilation**

113 Kijishi work as sole traders and have their own workshops. They have ventilation equipment  
114 installed in their workshops, such as a dust collector and a ventilation fan. Most kijishi adjust  
115 the settings of ventilation equipment depending on the amount of dust being generated. In  
116 this study, wood dust was measured while ventilation equipment was being operated because  
117 1) almost all kijishi who participated in the questionnaire survey were using ventilation  
118 equipment; and 2) kijishi would have been at risk of being exposed to wood dust if the  
119 ventilation equipment had not been operated.

120 Additionally, it was found that most kijishi secure an air inlet by opening windows  
121 located upstream of the ventilation equipment so that the air flows effectively. As such, the  
122 ventilation equipment was in operation, and the sliding door located upstream of the  
123 equipment was left ajar during dust measurement. We confirmed that the wind velocity was  
124 0.1 m/s or lower at the dust collection point before measurement (Figure 1-b, 1-c).

125 [Figure 1 near here]

126

## 127 **Wood Dust Collection Methods**

128 Dust particle sizes and measurement methods are key in measuring wood dust.

129 In this study, particle-size distribution, inhalable dust, and total dust were measured.

130 An Andersen-type air sampler (Sibata Scientific Technology Ltd., AN-200) was used to

131 measure particle-size distribution. The Andersen-type air sampler collects air samples that

132 include dust at an inhalation flow rate of 28.3 L/min, and (according to the package insert)

133 can classify collected samples into the following nine levels by aerodynamic particle size:

134  $\leq 0.43 \mu\text{m}$ ,  $0.43\text{--}0.65 \mu\text{m}$ ,  $0.65\text{--}1.1 \mu\text{m}$ ,  $1.1\text{--}2.1 \mu\text{m}$ ,  $2.1\text{--}3.3 \mu\text{m}$ ,  $3.3\text{--}4.7 \mu\text{m}$ ,  $4.7\text{--}7.0 \mu\text{m}$ ,

135  $7.0\text{--}11.0 \mu\text{m}$ , and  $\geq 11.0 \mu\text{m}$ . Thereafter, the masses of the dust samples (mg) were measured

136 for each particle size to obtain mass-based particle sizes.

137 The AN-200 was placed 65 mm away from the center of the bowl toward the kijishi

138 and at a height of 590 mm above the workbench. According to the questionnaire, kijishi

139 spend an average of approximately 8 hours per day on woodturning. Taking into account that

140 the room is sufficiently ventilated during a lunch break, we considered that kijishi are

141 consecutively exposed to wood dust for a mean duration of 4 hours per day. Hence, wood

142 dust for measurement was collected for 4 hours in this study (Figure 1-d). The participating

143 kijishi carried out tasks in 2-hour shifts. Eleven woodturning pieces were completed over the

144 course of 4 hours.

145 An inertial impaction-type air sampler (Sibata Scientific Technology Ltd., NW-354)

146 was used for measuring inhalable dust and total dust. Inertial impaction-type air samplers

147 enable size separation and collection of particles in the air by inertial impaction.<sup>6</sup> Total dust

148 refers to dust collected at a velocity of 0.5–0.8 m/s at the inlet of the dust collecting devices.<sup>7</sup>

149 Inhalable dust is defined as dust that penetrates a dust sampler with the following size

150 separation properties: a collection efficiency of 50% for dust with a size of up to 4.0  $\mu\text{m}$ , and  
151 0% for dust with a size of 10  $\mu\text{m}$  or greater<sup>7</sup> (Table 2).

152 [Table 2 near here]

153 The NW-354 was placed on the opposite side of the kijishi, 100 mm away from the  
154 center of the bowl, at a height of 460 mm above the workbench. Wood dust for measurement  
155 was also collected for a duration of 4 hours.

156 Also, background data were measured inside the room while woodturning was not  
157 being performed. Samples for background data were collected under the same conditions as  
158 those for measuring dust, that is, for 4 hours at a wind velocity of up to 0.1 m/s at the dust  
159 collection point.

160

## 161 **RESULTS**

### 162 **Questionnaire Results** (Table 3)

163 We collected responses from all 20 kijishi surveyed. The mean age of participants was 59.9  
164 years old ( $\pm 13.6$ ). Only one woman participated. Three participants had previously worked in  
165 occupations other than kijishi, namely as a gas station worker, furniture designer, and car  
166 mechanic, none of which involve exposure to wood dust. The history of asbestos inhalation  
167 and other related information for the three participants could not be confirmed.

168 [Table 3 near here]

169 Nine participants indicated the presence of diseases, including lower back pain and  
170 allergy symptoms, such as rhinitis and coughing. Four participants had diabetes, and two had  
171 hypertension. None of the participants had SNC. Nine participants were taking medications,  
172 including analgesics, agents for improving uric acid levels and those for improving liver  
173 function, and antidiabetic and antihypertensive agents. Regarding family history, four



174 participants had a family history of lung cancer, two of gastrointestinal cancer, and six of  
175 other cancers (details unknown).

176 As for lifestyle habits, 14 were consuming alcohol and smoking cigarettes. Ten  
177 participants were regularly engaging in exercise, such as walking. As for the work  
178 environment, only three participants reported using a face mask during woodturning.  
179 However, all but one of the participants had a room ventilator installed inside the workshop  
180 and were using it during woodturning. Data were considered to have been normally  
181 distributed according to the histogram (Figure S1), and median (IQR) or n (%) were used in  
182 indicating age (Table 3). As participants included only one woman, a histogram created by  
183 gender would have revealed her age. Therefore, the histogram indicates only the age  
184 distribution of all participants and the number of participants in each age group.

185

### 186 **Wood Dust Measurement Results**

187 Background data were collected at a room temperature of 25.7°C and humidity of 67.8%.

188 Data for dust measurement were collected at a room temperature of 26.9°C and humidity of  
189 62.8%. The particle size distribution of dust could not be calculated as only a limited amount  
190 of dust could be collected. Inhalable dust in the background and during woodturning was 0.04  
191 mg/m<sup>3</sup> and 0.03 mg/m<sup>3</sup>, respectively. Total dust in the background and during woodturning  
192 was 0.04 mg/m<sup>3</sup> and 0.22mg/m<sup>3</sup>, respectively.

193

### 194 **DISCUSSION**

195 As for inhalable dust, the measured value of 0.03 mg/m<sup>3</sup> during woodturning was almost the  
196 same as the background value of 0.04 mg/m<sup>3</sup>, and the smaller value during woodturning was  
197 probably due to measurement error. This may show that the dust concentration during  
198 woodturning is very small within the error margin. This indicates that the Kijishi were

199 adequately ventilated during woodturning and that their exposure to inhalable dust was very  
200 low.

201 It is well known that exposure to wood dust can cause a host of illnesses, including  
202 reduced respiratory function, lung disease, asthma, and even SNC. The Japanese government  
203 has created a list of allergens that can cause allergic respiratory disease (e.g., allergic rhinitis,  
204 bronchial asthma, pharyngitis), including western red cedar (*Thuja plicata*), nezuko (*Thuja*  
205 *standishii*), lauan, ryobu (*Clethra barbinervis*), mulberry, hoonoki (*Magnolia obovate*), and  
206 Shirakaba (*Betula platyphylla*). Allergic respiratory disease caused by exposure to wood dust  
207 of these types of wood is treated as an occupational disease in the country.<sup>8</sup> Although keyaki  
208 (*Zelkova serrata*) is not on the list, it can also cause allergic respiratory disease.

209 In this study, approximately half of the participants indicated that they had allergic  
210 symptoms such as rhinitis. All of those who responded to the survey as such were male. This  
211 percentage was almost the same as the results of the latest national epidemiological survey in  
212 Japan (the percentage of men with allergy symptoms: 49.7% in 2019).<sup>9</sup> Since this survey was  
213 conducted in March, which generally corresponds to the time when allergic rhinitis  
214 symptoms caused by Sugi (*Cryptomeria japonica*) and Hinoki (*Chamaecyparis obtusa*) are  
215 most likely to appear, the percentage of complaints of allergic symptoms obtained in this  
216 survey was also considered to be influenced by those pollens.

217 It is known that there is a positive association between smoking and allergy onset.<sup>10</sup>  
218 Fourteen of the twenty participants (four were smokers and ten had smoked in the past) had a  
219 history of smoking, which may have also influenced the proportion of participants reporting  
220 allergic symptoms.

221 As noted previously, most particles with a particle size of 10  $\mu\text{m}$  or greater remain in  
222 the nasal cavity and throat and are swallowed or spat in the form of phlegm.<sup>11</sup> We found that

223 most dust particles collected during woodturning were of this size (i.e., larger than inhalable  
224 dust). Such particles remain in the nasal cavity leading to allergic symptoms such as rhinitis.  
225 Wood Dust Exposure Limits are specified by the respective agencies as follows: <sup>8</sup>

- 226 a) Occupational Safety and Health Administration (OSHA): total dust = 15 mg/m<sup>3</sup>,  
227 respirable fraction = 5 mg/m<sup>3</sup> or less;
- 228 b) National Institute for Occupational Safety and Health (NIOSH): total dust = 1 mg/m<sup>3</sup>  
229 or less;
- 230 c) American Group of Governmental Industrial Hygienist (ACGIH): Inhalable  
231 particulate matter = 0.5 mg/m<sup>3</sup> for western red cedar and inhalable particulate matter  
232 = 1 mg/m<sup>3</sup> or less for other than western red cedar;
- 233 d) Health and Safety Executive Control of Substances Hazardous to Health (HSE  
234 COSHH) essentials (2020) stipulates: inhalable fraction = 3 mg/m<sup>3</sup> or less.

235 We in the present study found that the level of exposure to wood dust was low, that is,  
236 inhalable dust was 0.03 mg/m<sup>3</sup>, and total dust 0.22 mg/m<sup>3</sup>. The measured values were very  
237 low compared to OSHA, NIOSH, ACGIH, and HSE COSHH standards.

238 Some participants indicated that they experienced coughs and other symptoms when  
239 they inhaled large amounts of wood dust while making numerous large wooden items (e.g.,  
240 Japanese round tea box) in the 1970s. In those times, ventilation equipment was yet to be  
241 installed; therefore, large amounts of wood dust were suspended in the air. This finding is  
242 likely because constant ventilation during woodwork reduces exposure to wood dust.

243 As noted, none of the participants indicated the presence of SNC, which is a rare  
244 disease with morbidity of 1–2 in 100,000. In recent years, the number of patients with SNC  
245 has begun declining even further in Japan.<sup>12</sup> Data disclosed by the Cancer Information Center  
246 of the National Cancer Center do not include information on malignant neoplasms of the  
247 nasal cavity or the paranasal sinuses. The latest morbidity rate of these diseases is unknown.

248 Researchers considered that no participants in this study had SNC because it is an extremely  
249 rare disease. Hardwoods are considered to have a high risk of SNC.<sup>13</sup> Although there are no  
250 reports on the carcinogenicity of keyaki (*Zelkova serrata*), it is considered necessary to be  
251 careful about the occurrence of SNC considering that keyaki (*Zelkova serrata*) is a hardwood.  
252 Surveying a larger sample of kijishi could reveal cases of SNC.

253

#### 254 **Limitations**

255 This study relied on a questionnaire survey with a small sample size; therefore, the  
256 carcinogenicity of wood dust cannot be discussed on the basis of the present findings.  
257 Kijishi with advanced woodturning skills only require small amounts of coated abrasives  
258 during rokurobiki. Therefore, experienced kijishi are unlikely to be exposed to large amounts  
259 of wood dust.

260 Dust should be measured at the position of the nose of the kijishi. However, the  
261 measurement device could not be placed at the nose position as doing so would have  
262 interfered with tasks.

263 Further, it should be noted that this study has a selection bias because some kijishi do  
264 not belong to the Yamanaka Woodturning Technique Preservation Association.

265

#### 266 **CONCLUSION**

267 The real status of kijishi exposed to wood dust in the Yamanaka Woodturning Technique  
268 Preservation Association was revealed. Since the amount of wood dust exposure in the  
269 kijishi-workshops was very small due to the use of ventilation equipment, the potential health  
270 effects of wood dust were considered to be small.

271           Due to the small sample size of this survey, we believe that this study can be used as a

272 starting point for a more detailed study through a large-scale survey of kijishi involved in

273 lacquerware production in Japan.

274

275 **DATA SHARING AND DATA ACCESSIBILITY**

276 The datasets used and/or analyzed during the current study are available from the  
277 corresponding author on reasonable request.

278 **ACKNOWLEDGMENTS**

279 We would like to thank all the kijishi of the Yamanaka Woodturning Technique Preservation  
280 Association who participated in the survey.

281 We thank Shoichi Mukaide, Hirohiko Kawakita and Ryoza Kawagita for their guidance and  
282 work.

283 Moreover, the authors extend their sincere gratitude to all of those who spent their valuable  
284 time participating in this study. This study received financial support from the Public Interest  
285 Incorporated Foundation Japan Foundation for Promoting Welfare of Small and Medium-  
286 sized Enterprises (FY2020 Nihon Full Happ Research Grant).

287 **DISCLOSURE**

288 **Approval of the Research Protocol:** The study was approved by the ethics review  
289 committee of the Kaga Medical Center as well as the Yamanaka Woodturning Technique  
290 Preservation Association (approval number R1-8).

291 **Informed Consent:** Written consent was obtained from all participants.

292 **Registry and the Registration No. of the study/trial:** N/A.

293 **Animal Studies:** N/A.

294 **Conflict of Interest:** All the authors declare no conflicts of interest associated with the  
295 manuscript.

296 **REFERENCES**

- 297 1. Mertz M. *Wood and Traditional Woodworking in Japan*. Siga: Kaiseisha Press; 2016.
- 298 2. Ministry of Labour Occupational Health Unit. *Workplace Health and Safety*
- 299 *Terminology*. Japan Industrial Safety & Health Association. Tokyo: Japan Industrial
- 300 Safety and Health Association; 1993.
- 301 3. Douwes J, McLean D, Slater T, Travier N, Cheng S, Pearce N. Pine dust, atopy and
- 302 lung function: A cross-sectional study in sawmill workers. *Eur Respir J*
- 303 2006;28(4):791-798.
- 304 4. International Agency for Research on Cancer (IARC). Agents Classified by the IARC
- 305 Monographs
- 306 <http://monographs.iarc.fr/ENG/Classification/index.php>. Accessed April 25, 2023.
- 307 5. Kawamura T. *Elementary Colors: A Dictionary of Wood Species and Timber Surface*
- 308 *Texture*. Tokyo: SEIBUNDO SHINKOSHA Publishing Co., LTD; 2014.
- 309 6. Fujimoto K. Measuring dust generated from wood processing. *Wood Industry*
- 310 2016;71.2:82–85.
- 311 7. Japan Society for Occupational Health. Recommendations for permissible
- 312 concentrations, etc (FY2019). 2019;61:177–202.
- 313 8. Ministry of Health, Labour and Welfare. Cancer from Wood Dust.
- 314 <https://www.mhlw.go.jp/stf/shingi/2r9852000002b3ek-att/2r9852000002b3gs.pdf>.
- 315 Accessed April 25, 2023.
- 316 9. Ministry of Health, Labour and Welfare. Summary Report of Comprehensive Survey
- 317 of Living Conditions 2019. [https://www.mhlw.go.jp/english/database/db-](https://www.mhlw.go.jp/english/database/db-hss/dl/report_gaikyo_2019.pdf)
- 318 [hss/dl/report\\_gaikyo\\_2019.pdf](https://www.mhlw.go.jp/english/database/db-hss/dl/report_gaikyo_2019.pdf). Accessed April 25, 2023.
- 319

- 320 10. Strzelak A, Ratajczak A, Adamiec A, Feleszko W. Tobacco Smoke Induces and  
321 Alters Immune Responses in the Lung Triggering Inflammation, Allergy, Asthma and  
322 Other Lung Diseases: A Mechanistic Review. *Int J Environ Res Public Health*  
323 2018;15(5):1033.
- 324 11. The Knowledge of Occupational Health for Work Environment Measurement. Japan  
325 Association for Working Environment Measurement. Tokyo: Public interest  
326 incorporated association *Japan Association for Working Environment Measurement*;  
327 2019.
- 328 12. Kaga K. *New clinical otorhinolaryngology. Volume 3*. Tokyo: Chugai-Igakusha;  
329 2002.
- 330 13. World Health Organization (WHO). IARC Monographs 100c, 2018. Wood Dust.  
331 <https://monographs.iarc.who.int/wp-content/uploads/2018/06/mono100C-15.pdf>.  
332 Accessed April 25, 2023.  
333



334 **TABLES**

335 **Table 1.** Questionnaire items

|                                      |                                                                                                                                                                                                                                                                                                                                                   |
|--------------------------------------|---------------------------------------------------------------------------------------------------------------------------------------------------------------------------------------------------------------------------------------------------------------------------------------------------------------------------------------------------|
| Participants' background information | Gender, age, number of years of experience as kijishi, number of hours of work per day, history of occupation other than kijishi                                                                                                                                                                                                                  |
| Presence or absence of disease       | Presence or absence of allergic diseases such as rhinitis and cough (symptoms including shortness of breath, nasal congestion, rhinorrhea, and headache); presence or absence of sinonasal cancer/ diabetes/hypertension/dyslipidemia/lower back pain/hearing impairment, as well as related past history, medication history, and family history |
| Lifestyle habits of participants     | Presence or absence of alcohol consumption, smoking, and exercise habit                                                                                                                                                                                                                                                                           |
| Information on the work environment  | Use of a face mask during woodturning, availability and use of ventilation equipment during woodturning                                                                                                                                                                                                                                           |

336

337 **Table 2.** Types and definitions of dust

|                |                                                                                                                                                                                                                                                      |
|----------------|------------------------------------------------------------------------------------------------------------------------------------------------------------------------------------------------------------------------------------------------------|
| Dust           | Solid particulates that are generated when a solid material is processed by machine. These solid particulates are part of particulate matter floating in the air.                                                                                    |
| Inhalable dust | Dust that penetrates a sampler with the following size separation properties: a collection efficiency of 50% for dust with a size of up to 4.0 $\mu\text{m}$ ; and a collection efficiency of 0% for dust with a size of 10 $\mu\text{m}$ or greater |
| Total dust     | Dust that is collected at a velocity of 50–80 cm/sec at the inlet of the collecting device                                                                                                                                                           |

338

339 **Table 3.** Questionnaire results: Subject characteristics

| Subject characteristics                                           |        |                 |
|-------------------------------------------------------------------|--------|-----------------|
|                                                                   |        | Overall         |
|                                                                   |        | n=20            |
| Age, n (%)                                                        | 30s    | 1 (5%)          |
|                                                                   | 40s    | 3 (15%)         |
|                                                                   | 50s    | 8 (40%)         |
|                                                                   | 60s    | 3 (15%)         |
|                                                                   | 70s    | 3 (15%)         |
|                                                                   | 80s    | 2 (10%)         |
| Sex, n (%)                                                        | Male   | 19 (95%)        |
|                                                                   | Female | 1 (5%)          |
| Age at which participants started their career as kijishi (years) |        | 18 (17.5, 20)   |
| Number of years of experience as Kijishi (years)                  |        | 40 (27.5, 53.5) |
| Mean number of hours spent on woodturning per day(hours)          |        | 7.8             |
| Allergy symptoms, n (%)                                           |        | 9 (45%)         |
| Lower back pain, n (%)                                            |        | 9 (45%)         |
| Hearing impairment, n (%)                                         |        | 6 (30%)         |
| Diabetes, n (%)                                                   |        | 4 (20%)         |
| Hypertension, n (%)                                               |        | 2 (10%)         |
| Oral medication, n (%)                                            |        | 9 (45%)         |
| Alcohol consumption history, n (%)                                |        | 14 (70%)        |
| Smoking history, n (%)                                            |        | 14 (70%)        |
| Family history, n (%)                                             |        | 12(60%)         |
| Exercise habit, n (%)                                             |        | 10 (50%)        |
| Use of face mask during lathe work, n (%)                         |        | 3 (15%)         |
| Ventilation equipment in the workshop, n (%)                      |        | 19 (95%)        |
| Work history other than kijishi, n (%)                            |        | 3 (15%)         |
| Statistics presented: median (IQR) or n (%)                       |        |                 |

341 **FIGURE LEGENDS**

342 **Figure 1.** Work scene, etc.

343 1-a: Working on Rokurobiki and dust measurement in the workshop

344 1-b: Schematic diagram of the workshop

345 1-c: Work with the door slightly open.

346 1-d: Generation of wood dust through the use of coated abrasives

347

348 **Supporting Information**

349 **Figure S1.** A histogram of participants age groups (years)
